# Supplementary material
Source: PubMed Central journal article supplement (PMC6661224)
Supplement: NIHMS1518250-supplement-1.pdf [file NIHMS1518250-supplement-1.pdf]

**Supplementary Information**

This file presents Supplementary Tables 1 through 3. Supplementary Table 1 includes the distribution of correlates among SELF participants randomly selected for inclusion in the present study (N=766) and those not included (N=930). The correlates include age, season of enrollment clinic visit, marital status, education, household income, smoking status, alcohol use, body mass index, age at menarche, parity, and sunscreen use. Supplementary Table 2 provides the adjusted results for a sensitivity analysis using averaged baseline and 20 month concentrations of BPF, BPS, 2,4-dichlorophenol, benzophenone-3, and triclosan; Supplementary Table 3 presents these data for butyl, ethyl, and methyl parabens.

Supplemental Table 1. Distribution of correlates of interest among SELF participants included in the EDCs substudy and participants not included in the substudy<sup>1, 2</sup>

| <b>Characteristic</b>                              | <b>Not included<br/>in EDCs<br/>substudy<br/>N=930</b> | <b>Included in<br/>EDCs<br/>substudy<br/>N=766</b> |
|----------------------------------------------------|--------------------------------------------------------|----------------------------------------------------|
| Age at baseline (years)                            |                                                        |                                                    |
| 23-25                                              | 194 (20.9)                                             | 184 (24.0)                                         |
| 26-28                                              | 233 (25.1)                                             | 191 (24.9)                                         |
| 29-31                                              | 255 (27.4)                                             | 204 (26.6)                                         |
| 32-35                                              | 248 (26.7)                                             | 187 (24.4)                                         |
| Season of enrollment clinic visit                  |                                                        |                                                    |
| Spring (March, April, May)                         | 226 (24.3)                                             | 171 (22.3)                                         |
| Summer (June, July, August)                        | 253 (27.2)                                             | 251 (32.8)                                         |
| Autumn (September, October, November)              | 240 (25.8)                                             | 206 (26.9)                                         |
| Winter (December, January, February)               | 211 (22.7)                                             | 138 (18.0)                                         |
| Marital status                                     |                                                        |                                                    |
| Never married                                      | 556 (59.8)                                             | 439 (57.3)                                         |
| Currently married                                  | 248 (26.7)                                             | 217 (28.3)                                         |
| Previously married                                 | 126 (13.6)                                             | 110 (14.4)                                         |
| Education                                          |                                                        |                                                    |
| ≤High school diploma/GED                           | 207 (22.3)                                             | 163 (21.3)                                         |
| Some college/Associate's/Technical                 | 458 (49.3)                                             | 393 (51.3)                                         |
| ≥Bachelor's degree                                 | 265 (28.5)                                             | 210 (27.4)                                         |
| Annual household income                            |                                                        |                                                    |
| <\$20 000                                          | 426 (45.8)                                             | 351 (45.8)                                         |
| \$20 000-\$50 000                                  | 343 (36.9)                                             | 289 (37.7)                                         |
| >\$50 000                                          | 161 (17.3)                                             | 126 (16.5)                                         |
| Smoking status                                     |                                                        |                                                    |
| Never                                              | 686 (73.8)                                             | 561 (73.20)                                        |
| Past                                               | 65 (7.0)                                               | 60 (7.8)                                           |
| Current                                            | 179 (19.3)                                             | 145 (18.9)                                         |
| Alcohol use within the last year                   |                                                        |                                                    |
| None                                               | 285 (30.7)                                             | 217 (28.3)                                         |
| 1-5 drinks/day or ≥4 drinks once per month or less | 468 (50.3)                                             | 394 (51.4)                                         |
| ≥6 drinks/day or ≥4 drinks twice per month or more | 177 (19.0)                                             | 155 (20.2)                                         |
| Body mass index (kg/m <sup>2</sup> )               |                                                        |                                                    |
| <25.0                                              | 190 (20.4)                                             | 146 (19.1)                                         |
| 25.0-29.9                                          | 190 (20.4)                                             | 160 (20.9)                                         |
| 30.0-34.9                                          | 179 (19.3)                                             | 150 (19.6)                                         |
| ≥35.0                                              | 371 (39.9)                                             | 310 (40.5)                                         |
| Age at menarche (years)                            |                                                        |                                                    |
| ≤10                                                | 183 (19.7)                                             | 127 (16.6)                                         |

|                   |            |            |
|-------------------|------------|------------|
| 11                | 172 (18.5) | 162 (21.2) |
| 12                | 251 (27.0) | 208 (27.2) |
| 13                | 155 (16.7) | 132 (17.2) |
| ≥14               | 169 (18.2) | 137 (17.9) |
| Parity (births)   |            |            |
| 0                 | 371 (39.9) | 292 (38.1) |
| 1                 | 225 (24.2) | 208 (27.2) |
| 2                 | 183 (19.7) | 130 (17.0) |
| ≥3                | 151 (16.2) | 136 (17.8) |
| Sunscreen use     |            |            |
| Never/hardly ever | 679 (73.0) | 575 (75.1) |
| Sometimes         | 150 (16.1) | 104 (13.6) |
| Often/always      | 101 (10.9) | 87 (11.4)  |

<sup>1</sup>Abbreviations: EDC, endocrine disrupting chemical; GED, General Educational Diploma; SELF, Study of Environment, Lifestyle, and Fibroids

<sup>2</sup>Sum of percentages may exceed 100 due to rounding.

Supplemental Table 2. Percentage difference<sup>1</sup> in averaged baseline and 20 month creatinine-corrected concentrations (µg/g creatinine) of BPF, BPS, 2,4-dichlorophenol, benzophenone-3, and triclosan by baseline characteristics among SELF participants

| Characteristic                        | BPF             |                | BPS             |               | 2,4-dichlorophenol |               | Benzophenone-3  |                | Triclosan       |               |
|---------------------------------------|-----------------|----------------|-----------------|---------------|--------------------|---------------|-----------------|----------------|-----------------|---------------|
|                                       | Adj. pct. diff. | Adj. 95% CI    | Adj. pct. diff. | Adj. 95% CI   | Adj. pct. diff.    | Adj. 95% CI   | Adj. pct. diff. | Adj. 95% CI    | Adj. pct. diff. | Adj. 95% CI   |
| Age (yrs)                             |                 |                |                 |               |                    |               |                 |                |                 |               |
| 23-25                                 | -34.0           | (-60.1, 9.1)   | -2.6            | (-25.0, 26.5) | 0.5                | (-19.9, 26.1) | -13.3           | (-41.1, 27.5)  | -21.9           | (-46.5, 14.0) |
| 26-28                                 | -41.9           | (-64.2, -5.7)  | -7.4            | (-28.1, 19.1) | -13.4              | (-30.3, 7.5)  | 3.2             | (-28.7, 49.3)  | -17.6           | (-42.6, 18.3) |
| 29-31                                 | -41.3           | (-63.2, -6.5)  | 8.2             | (-15.1, 37.9) | -2.8               | (-21.1, 19.9) | -0.1            | (-30.1, 42.7)  | -8.7            | (-35.7, 29.5) |
| 32-35                                 | 0               | Reference      | 0               | Reference     | 0                  | Reference     | 0               | Reference      | 0               | Reference     |
| Season of urine collection            |                 |                |                 |               |                    |               |                 |                |                 |               |
| Spring (March, April, May)            | 40.7            | (-16.1, 136.0) | 24.3            | (-5.0, 62.7)  | -17.1              | (-34.5, 5.0)  | -23.8           | (-49.1, 14.0)  | -20.6           | (-46.5, 17.7) |
| Summer (June, July, August)           | 59.8            | (0.0, 155.4)   | 21.9            | (-4.5, 55.6)  | -17.5              | (-33.4, 2.1)  | -6.2            | (-34.9, 35.2)  | -19.6           | (-43.8, 14.9) |
| Autumn (September, October, November) | 50.0            | (-8.2, 145.1)  | 30.9            | (1.4, 69.1)   | -17.6              | (-33.9, 2.8)  | -33.5           | (-54.3, -3.0)  | -21.7           | (-45.9, 13.2) |
| Winter (December, January, February)  | 0               | Reference      | 0               | Reference     | 0                  | Reference     | 0               | Reference      | 0               | Reference     |
| Marital status                        |                 |                |                 |               |                    |               |                 |                |                 |               |
| Never married                         | 0               | Reference      | 0               | Reference     | 0                  | Reference     | 0               | Reference      | 0               | Reference     |
| Currently married                     | 11.6            | (-26.0, 68.1)  | -10.3           | (-27.6, 11.0) | -7.3               | (-23.0, 11.6) | -0.4            | (-27.3, 36.7)  | -1.0            | (-27.3, 34.9) |
| Previously married                    | 31.6            | (-18.9, 113.4) | 0               | (-22.3, 28.6) | -4.5               | (-23.1, 18.7) | -11.0           | (-38.5, 28.9)  | 3.9             | (-27.7, 49.3) |
| Education                             |                 |                |                 |               |                    |               |                 |                |                 |               |
| ≤High school diploma/GED              | 0               | Reference      | 0               | Reference     | 0                  | Reference     | 0               | Reference      | 0               | Reference     |
| Some college/Associates/Technical     | -18.7           | (-48.1, 27.5)  | -3.2            | (-23.4, 22.3) | 18.4               | (-3.4, 45.2)  | 26.1            | (-11.0, 78.5)  | 33.9            | (-4.7, 88.2)  |
| ≥Bachelors degree                     | -28.4           | (-60.8, 30.7)  | 3.3             | (-24.5, 41.3) | 16.5               | (-11.3, 53.1) | 46.0            | (-8.3, 132.3)  | 54.4            | (-2.0, 143.4) |
| Household income                      |                 |                |                 |               |                    |               |                 |                |                 |               |
| <\$20,000                             | 0               | Reference      | 0               | Reference     | 0                  | Reference     | 0               | Reference      | 0               | Reference     |
| \$20,000-\$50,000                     | -5.4            | (-36.5, 41.2)  | -24.6           | (-38.7, -7.1) | 11.7               | (-6.8, 33.8)  | 14.7            | (-15.7, 56.0)  | 36.9            | (1.3, 85.1)   |
| >\$50,000                             | -16.4           | (-52.2, 46.4)  | -14.5           | (-36.1, 14.4) | 26.4               | (-1.9, 62.8)  | 25.7            | (-18.4, 93.5)  | 98.6            | (30.1, 203.1) |
| Smoking status                        |                 |                |                 |               |                    |               |                 |                |                 |               |
| Never                                 | 0               | Reference      |                 | Reference     | 0                  | Reference     | 0               | Reference      | 0               | Reference     |
| Past                                  | -12.0           | (-51.8, 60.8)  | 11.3            | (-18.6, 52.3) | 26.4               | (-4.0, 66.3)  | -45.4           | (-65.9, -12.8) | -10.7           | (-43.6, 41.3) |
| Current                               | -6.5            | (-42.0, 50.7)  | 25.8            | (-1.9, 61.3)  | 0.4                | (-19.0, 24.5) | -37.7           | (-56.8, -10.1) | -35.1           | (-54.7, -7.1) |

|                                                    |       |                |      |               |       |               |       |                |       |                |  |
|----------------------------------------------------|-------|----------------|------|---------------|-------|---------------|-------|----------------|-------|----------------|--|
| Alcohol use within the last year                   |       |                |      |               |       |               |       |                |       |                |  |
| None                                               | 0     | Reference      | 0    | Reference     |       | Reference     | 0     | Reference      | 0     | Reference      |  |
| 1-5 drinks/day or ≥4 drinks once per month or less | -31.4 | (-53.5, 1.3)   | 10.3 | (-9.9, 35.1)  | -15.6 | (-29.2, 0.7)  | -19.0 | (-40.0, 9.4)   | 15.1  | (-14.3, 54.4)  |  |
| ≥6 drinks/day or ≥4 drinks twice per month or more | -29.5 | (-56.8, 15.0)  | -0.5 | (-22.9, 28.3) | -20.2 | (-36.0, -0.5) | -16.5 | (-42.7, 21.7)  | -6.6  | (-35.4, 35.0)  |  |
| Body mass index (kg/m <sup>2</sup> )               |       |                |      |               |       |               |       |                |       |                |  |
| <25.0                                              | 0     | Reference      | 0    | Reference     | 0     | Reference     | 0     | Reference      | 0     | Reference      |  |
| 25.0-29.9                                          | -24.9 | (-54.7, 24.6)  | 8.3  | (-16.8, 40.9) | 13.5  | (-9.7, 42.7)  | 12.2  | (-24.0, 65.8)  | 13.9  | (-22.2, 67.0)  |  |
| 30.0-34.9                                          | 24.5  | (-26.3, 110.1) | 6.6  | (-18.8, 40.0) | 11.6  | (-11.8, 41.4) | 6.6   | (-28.7, 59.4)  | 8.3   | (-27.0, 60.7)  |  |
| ≥35.0                                              | 28.4  | (-18.4, 102.0) | 14.2 | (-9.8, 44.6)  | 2.7   | (-16.4, 26.1) | 13.7  | (-19.9, 61.3)  | -5.2  | (-32.7, 33.5)  |  |
| Age at menarche                                    |       |                |      |               |       |               |       |                |       |                |  |
| ≤10                                                | 75.3  | (5.0, 192.9)   | 4.2  | (-20.2, 36.1) | -2.6  | (-22.8, 23.0) | 53.6  | (3.2, 128.5)   | 34.1  | (-9.1, 97.8)   |  |
| 11                                                 | 0.2   | (-37.0, 59.4)  | 13.5 | (-10.8, 44.5) | 3.5   | (-16.2, 27.8) | 2.5   | (-28.5, 46.8)  | 17.0  | (-17.7, 66.3)  |  |
| 12                                                 | 0     | Reference      | 0    | Reference     | 0     | Reference     | 0     | Reference      | 0     | Reference      |  |
| 13                                                 | -16.8 | (-48.3, 33.9)  | 5.2  | (-17.9, 34.8) | 9.9   | (-11.2, 36.2) | 34.9  | (-6.3, 94.4)   | 1.8   | (-28.8, 45.5)  |  |
| ≥14                                                | 45.7  | (-12.0, 141.2) | 9.5  | (-15.8, 42.4) | 16.6  | (-7.1, 46.3)  | -15.3 | (-42.5, 24.8)  | 29.4  | (-11.4, 89.1)  |  |
| Parity (births)                                    |       |                |      |               |       |               |       |                |       |                |  |
| 0                                                  | 0     | Reference      | 0    | Reference     | 0     | Reference     | 0     | Reference      | 0     | Reference      |  |
| 1                                                  | 13.5  | (-25.6, 72.9)  | 19.8 | (-3.8, 49.2)  | -15.8 | (-30.4, 1.7)  | -38.0 | (-55.1, -14.3) | -33.3 | (-51.4, -8.4)  |  |
| 2                                                  | -0.4  | (-40.5, 66.9)  | 42.0 | (8.6, 85.8)   | -21.3 | (-37.7, -0.6) | -40.8 | (-60.2, -11.8) | -24.0 | (-48.6, 12.2)  |  |
| ≥3                                                 | -2.2  | (-42.2, 65.3)  | 56.7 | (19.2, 105.9) | -12.5 | (-30.9, 10.9) | -36.1 | (-57.3, -4.3)  | -39.5 | (-59.3, -10.3) |  |
| Sunscreen use                                      |       |                |      |               |       |               |       |                |       |                |  |
| Never/hardly ever                                  | 0     | Reference      | 0    | Reference     | 0     | Reference     | 0     | Reference      | 0     | Reference      |  |
| Sometimes                                          | -0.9  | (-38.8, 60.6)  | -4.5 | (-25.7, 22.7) | -6.2  | (-24.5, 16.5) | 83.0  | (26.4, 164.9)  | -14.9 | (-40.8, 22.2)  |  |
| Often/always                                       | 15.7  | (-32.9, 99.5)  | 1.4  | (-23.6, 34.7) | 1.4   | (-20.8, 29.7) | 248.8 | (129.0, 431.3) | -5.3  | (-37.7, 43.0)  |  |

<sup>1</sup>Adj. models are adjusted for all correlates.

Supplemental Table 3. Percentage difference<sup>1</sup> in averaged baseline and 20 month creatinine-corrected concentrations (µg/g creatinine) of butyl, ethyl, and methyl parabens by baseline characteristics among SELF participants

| Characteristic                        | Butyl paraben   |                | Ethyl paraben   |                | Methyl paraben  |               |
|---------------------------------------|-----------------|----------------|-----------------|----------------|-----------------|---------------|
|                                       | Adj. pct. diff. | Adj. 95% CI    | Adj. pct. diff. | Adj. 95% CI    | Adj. pct. diff. | Adj. 95% CI   |
| Age (yrs)                             |                 |                |                 |                |                 |               |
| 23-25                                 | -28.4           | (-54.0, 11.5)  | -14.4           | (-44.5, 32.0)  | -1.2            | (-27.6, 34.8) |
| 26-28                                 | -36.5           | (-58.4, -3.1)  | -10.4           | (-40.8, 35.4)  | -4.9            | (-29.4, 27.9) |
| 29-31                                 | -36.4           | (-57.8, -4.2)  | -25.1           | (-49.8, 11.7)  | -20.9           | (-40.6, 5.4)  |
| 32-35                                 | 0               | Reference      | 0               | Reference      | 0               | Reference     |
| Season of urine collection            |                 |                |                 |                |                 |               |
| Spring (March, April, May)            | -14.7           | (-46.2, 35.4)  | -28.0           | (-54.1, 13.0)  | -7.1            | (-32.8, 28.4) |
| Summer (June, July, August)           | 28.3            | (-15.6, 95.0)  | 8.4             | (-28.0, 63.1)  | 2.4             | (-23.6, 37.3) |
| Autumn (September, October, November) | -5.0            | (-38.3, 46.2)  | -2.7            | (-36.2, 48.2)  | -13.8           | (-36.3, 16.6) |
| Winter (December, January, February)  | 0               | Reference      | 0               | Reference      | 0               | Reference     |
| Marital status                        |                 |                |                 |                |                 |               |
| Never married                         | 0               | Reference      | 0               | Reference      | 0               | Reference     |
| Currently married                     | 5.5             | (-26.5, 51.5)  | -37.1           | (-55.8, -10.4) | -21.8           | (-39.3, 0.8)  |
| Previously married                    | 33.8            | (-12.5, 104.5) | 22.9            | (-18.8, 86.1)  | 15.0            | (-14.6, 54.8) |
| Education                             |                 |                |                 |                |                 |               |
| ≤High school diploma/GED              | 0               | Reference      | 0               | Reference      | 0               | Reference     |
| Some college/Associates/Technical     | 1.4             | (-32.0, 51.0)  | -2.7            | (-34.1, 43.6)  | 87.7            | (42.0, 148.2) |
| ≥Bachelors degree                     | 14.8            | (-32.6, 95.6)  | 24.8            | (-25.8, 109.9) | 87.0            | (28.7, 171.6) |
| Household income                      |                 |                |                 |                |                 |               |
| <\$20,000                             | 0               | Reference      | 0               | Reference      | 0               | Reference     |
| \$20,000-\$50,000                     | 18.0            | (-17.1, 68.0)  | 19.6            | (-15.3, 68.8)  | 1.5             | (-20.7, 30.0) |
| >\$50,000                             | 61.5            | (-1.5, 164.9)  | 3.0             | (-36.4, 67.1)  | -10.7           | (-36.9, 26.4) |
| Smoking status                        |                 |                |                 |                |                 |               |
| Never                                 | 0               | Reference      | 0               | Reference      | 0               | Reference     |
| Past                                  | 25.7            | (-26.6, 115.0) | -4.3            | (-43.4, 61.7)  | -12.3           | (-39.9, 27.8) |
| Current                               | -3.6            | (-36.7, 46.7)  | 23.2            | (-18.3, 85.7)  | -0.2            | (-25.7, 34.0) |
| Alcohol use within the last year      |                 |                |                 |                |                 |               |

|                                                                |       |                |       |               |       |               |
|----------------------------------------------------------------|-------|----------------|-------|---------------|-------|---------------|
| None                                                           | 0     | Reference      | 0     | Reference     | 0     | Reference     |
| 1-5 drinks/day or $\geq 4$ drinks once per month or less       | -6.0  | (-33.4, 32.6)  | 19.8  | (-14.4, 67.7) | -21.7 | (-38.5, -0.3) |
| $\geq 6$ drinks/day or $\geq 4$ drinks twice per month or more | -29.6 | (-54.3, 8.5)   | 85.4  | (21.6, 182.7) | -10.3 | (-33.7, 21.4) |
| Body mass index (kg/m <sup>2</sup> )                           |       |                |       |               |       |               |
| <25.0                                                          | 0     | Reference      | 0     | Reference     | 0     | Reference     |
| 25.0-29.9                                                      | -2.6  | (-37.7, 52.3)  | -31.0 | (-55.4, 6.8)  | -10.1 | (-34.3, 23.1) |
| 30.0-34.9                                                      | 10.3  | (-30.5, 74.9)  | -0.8  | (-36.8, 55.7) | -11.1 | (-35.7, 22.8) |
| $\geq 35.0$                                                    | -21.7 | (-47.6, 16.9)  | -26.2 | (-50.1, 9.1)  | -21.3 | (-40.6, 4.2)  |
| Age at menarche                                                |       |                |       |               |       |               |
| $\leq 10$                                                      | 33.2  | (-15.5, 110.0) | 6.5   | (-31.7, 66.2) | -3.8  | (-30.1, 32.3) |
| 11                                                             | 6.1   | (-29.7, 60.1)  | -17.5 | (-44.9, 23.3) | 6.2   | (-20.5, 41.7) |
| 12                                                             | 0     | Reference      | 0     | Reference     | 0     | Reference     |
| 13                                                             | 53.5  | (1.1, 133.3)   | 9.5   | (-27.2, 64.8) | 4.3   | (-22.2, 39.8) |
| $\geq 14$                                                      | -20.3 | (-48.9, 24.2)  | 18.9  | (-22.9, 83.5) | 38.2  | (1.2, 88.7)   |
| Parity (births)                                                |       |                |       |               |       |               |
| 0                                                              | 0     | Reference      | 0     | Reference     | 0     | Reference     |
| 1                                                              | -31.8 | (-52.9, -1.2)  | 20.9  | (-15.8, 73.7) | 12.3  | (-13.4, 45.6) |
| 2                                                              | -21.1 | (-50.0, 24.6)  | 5.6   | (-32.4, 64.9) | -5.6  | (-31.5, 30.0) |
| $\geq 3$                                                       | -24.3 | (-52.3, 20.1)  | 17.5  | (-25.1, 84.5) | 23.9  | (-10.4, 71.3) |
| Sunscreen use                                                  |       |                |       |               |       |               |
| Never/hardly ever                                              | 0     | Reference      | 0     | Reference     | 0     | Reference     |
| Sometimes                                                      | 14.1  | (-25.3, 74.4)  | -0.8  | (-34.4, 50.1) | 0.8   | (-25.1, 35.8) |
| Often/always                                                   | 48.1  | (-8.6, 139.9)  | 72.2  | (7.5, 175.7)  | 35.7  | (-3.2, 90.3)  |

<sup>1</sup>Adj. models are adjusted for all correlates.
